# Supplementary material for: Cobalt-centred boron molecular drums with the highest coordination number in the CoB16− cluster
Source: PubMed Central journal article supplement (PMC4633964; doi:10.1038/ncomms9654), 2015-10-12
Supplement: ncomms9654-s1.pdf [file ncomms9654-s1.pdf]

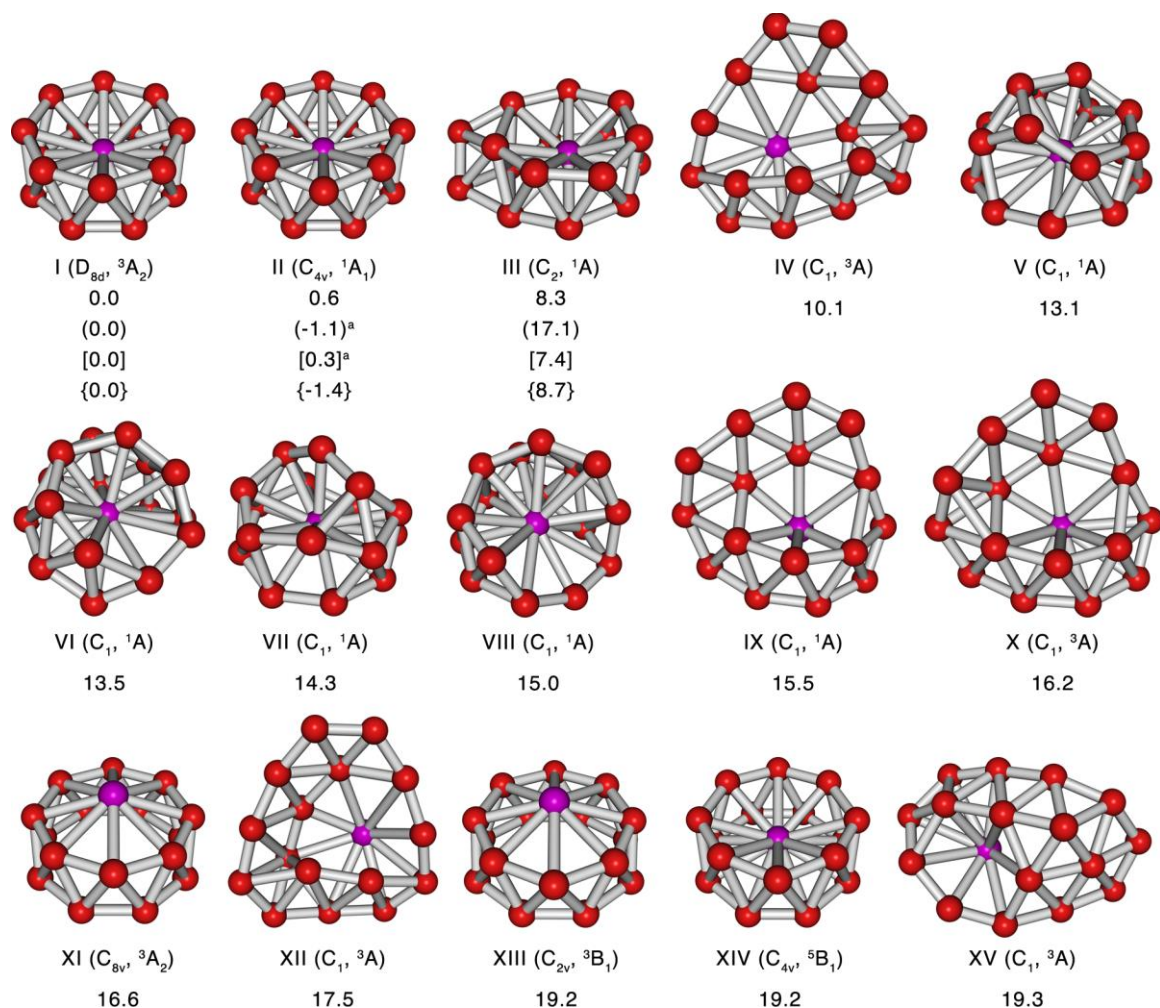

**Supplementary Figure 1. Relative energies (in kcal/mol) of the lowest lying (<20 kcal/mol above the global minimum) isomers of  $\text{CoB}_{16}^-$  at the PBE0/Def2-TZVP level of theory.**

B3LYP/Def2-TZVP, TPSSH/Def2-TZVP, and ROCCSD(T)/6-311+G(2df)//PBE0/Def2-TZVP relative energies for the three lowest energy isomers **I**, **II**, and **III** are shown in parenthesis, square brackets, and curly brackets, respectively. All energies are corrected for zero-point energies (ZPE) at their respective levels of theory aside from single-point coupled-cluster calculations, which are ZPE corrected at PBE0/Def2-TZVP. The  $C_{4v}$  structure (isomer **II**) has one imaginary frequency at this level of theory. Geometry optimization following the imaginary frequency leads to the local minimum structure possessing  $C_4$  symmetry. However, including ZPE corrections the vibrationally averaged structure has effectively  $C_{4v}$  symmetry.

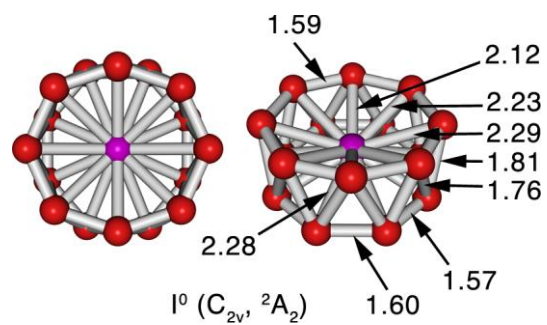

**Supplementary Figure 2. Two views of the neutral  $\text{CoB}_{16}$  isomer  $I^0$ .**

Its point group symmetries and spectroscopic states are shown in parenthesis. All distances are in Å.

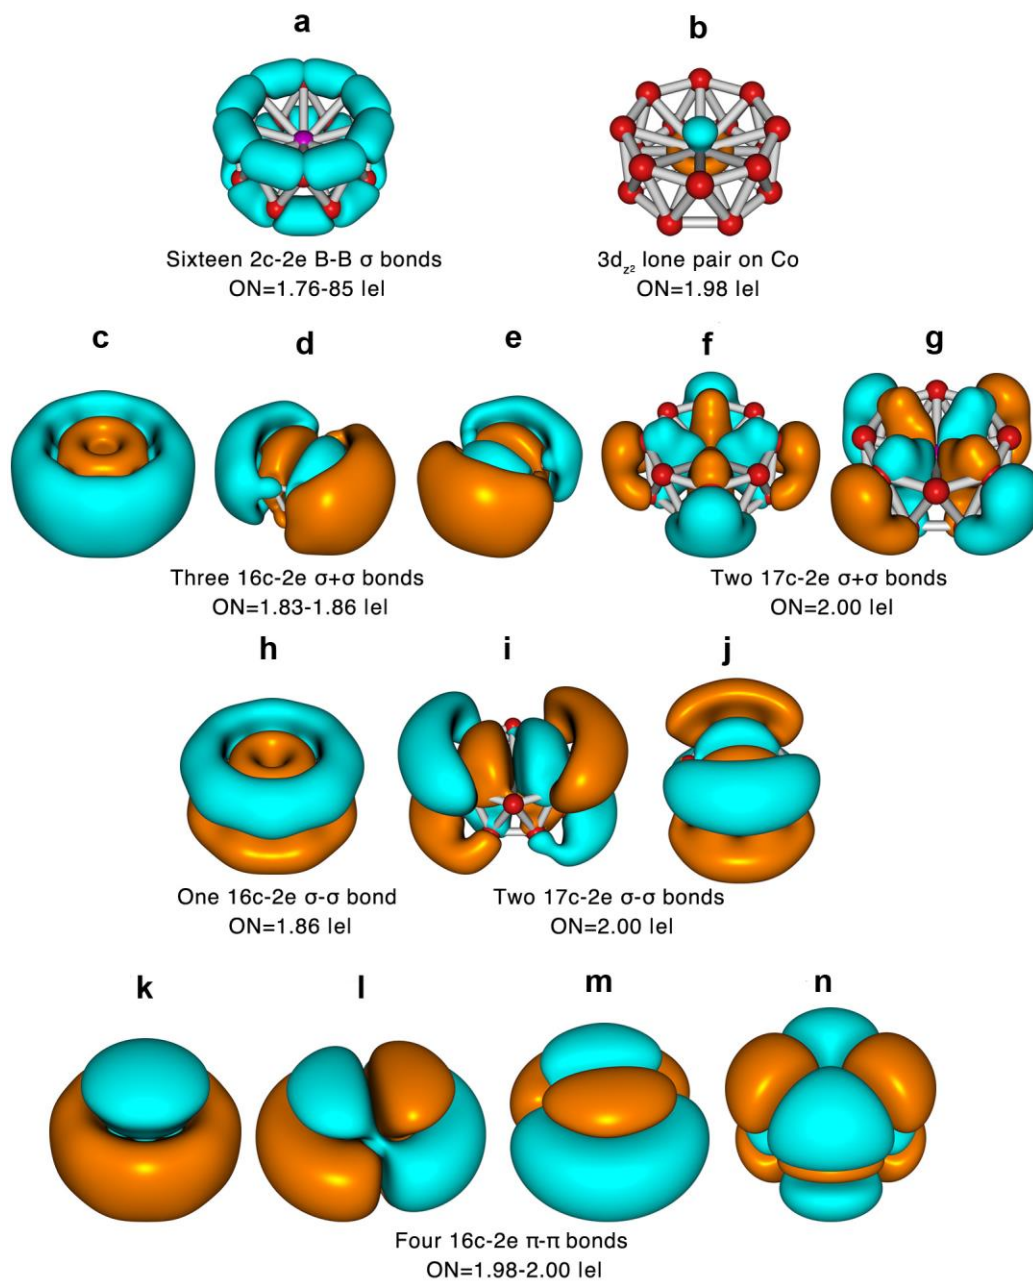

**Supplementary Figure 3. The AdNDP chemical bonding picture obtained for isomer II ( $C_{4v}$ ,  $^1A_1$ ) of  $CoB_{16}^-$ .**

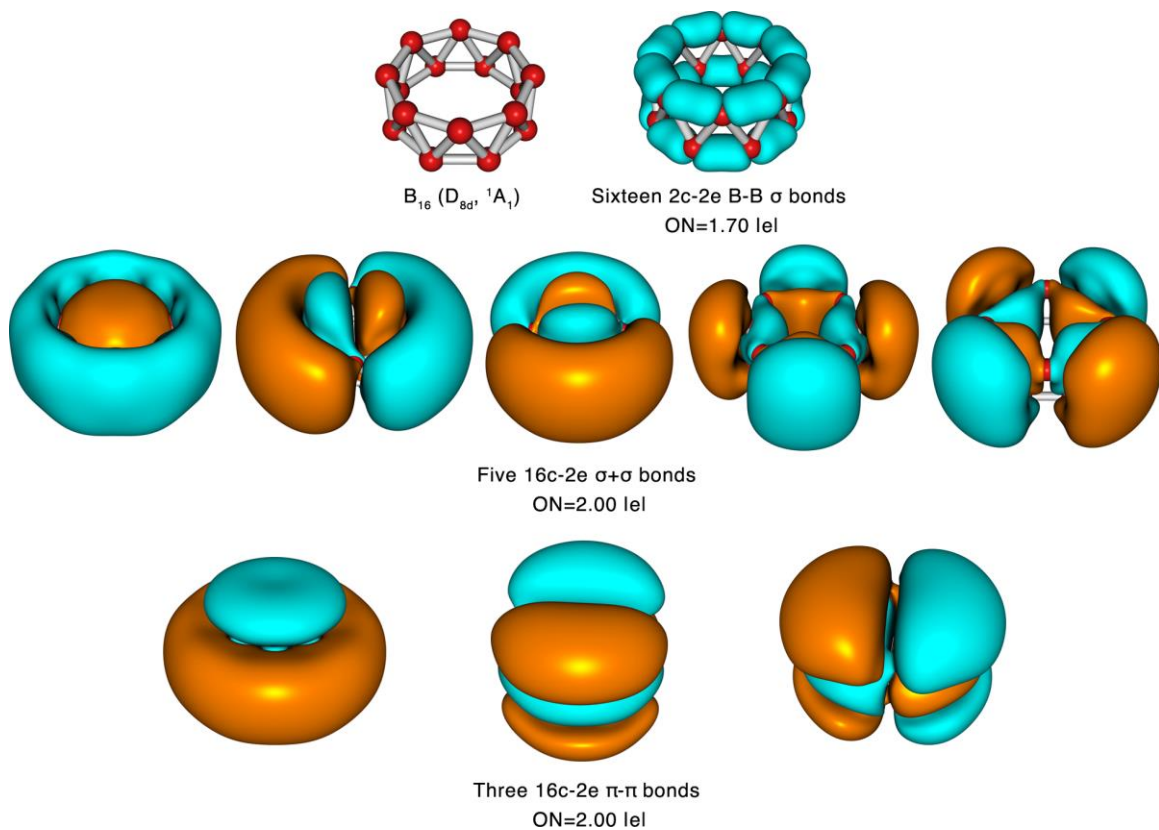

**Supplementary Figure 4. The AdNDP chemical bonding picture obtained for the tubular isomer of the  $B_{16}$  cluster.**

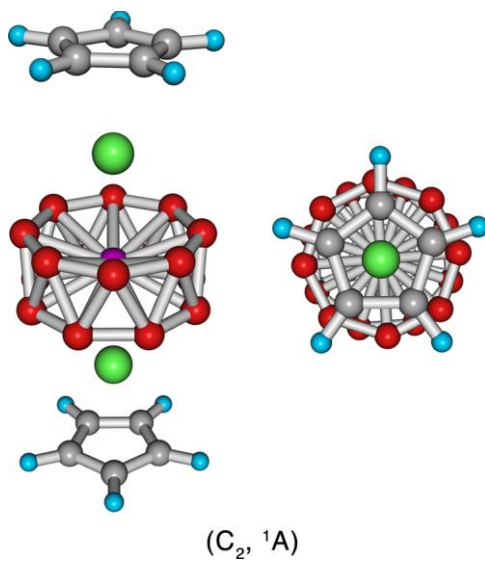

**Supplementary Figure 5. Two views of the triple-decked [CoB<sub>16</sub>(CaCp)<sub>2</sub>]<sup>-</sup> cluster.**

Its point group symmetry and spectroscopic state are shown in parenthesis. Color scheme: Ca is green, C is grey, H is blue, B is red, and Co is magenta.

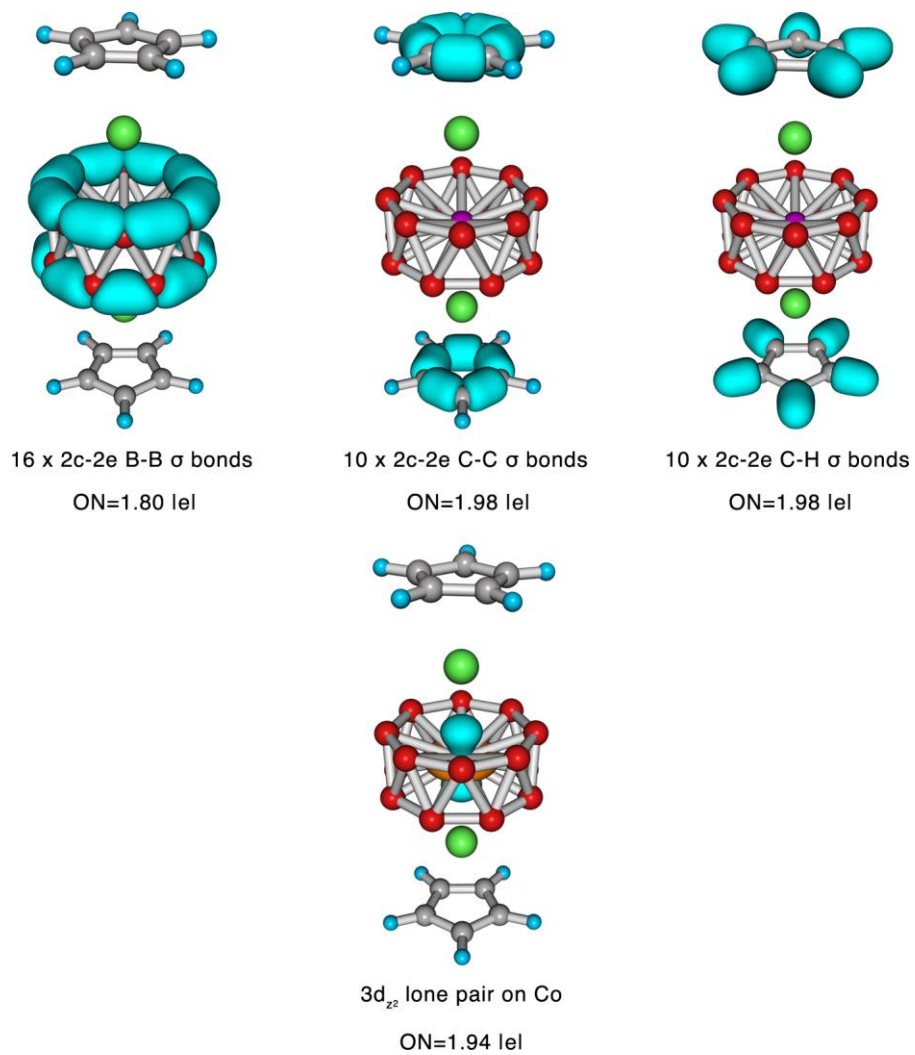

**Supplementary Figure 6. Localized elements of chemical bonding: 1c-2e (lone pairs) and 2c-2e (classical two-center two-electron) bonds found on both the  $\text{CoB}_{16}^{3-}$  and  $\text{C}_5\text{H}_5^-$  fragments.**

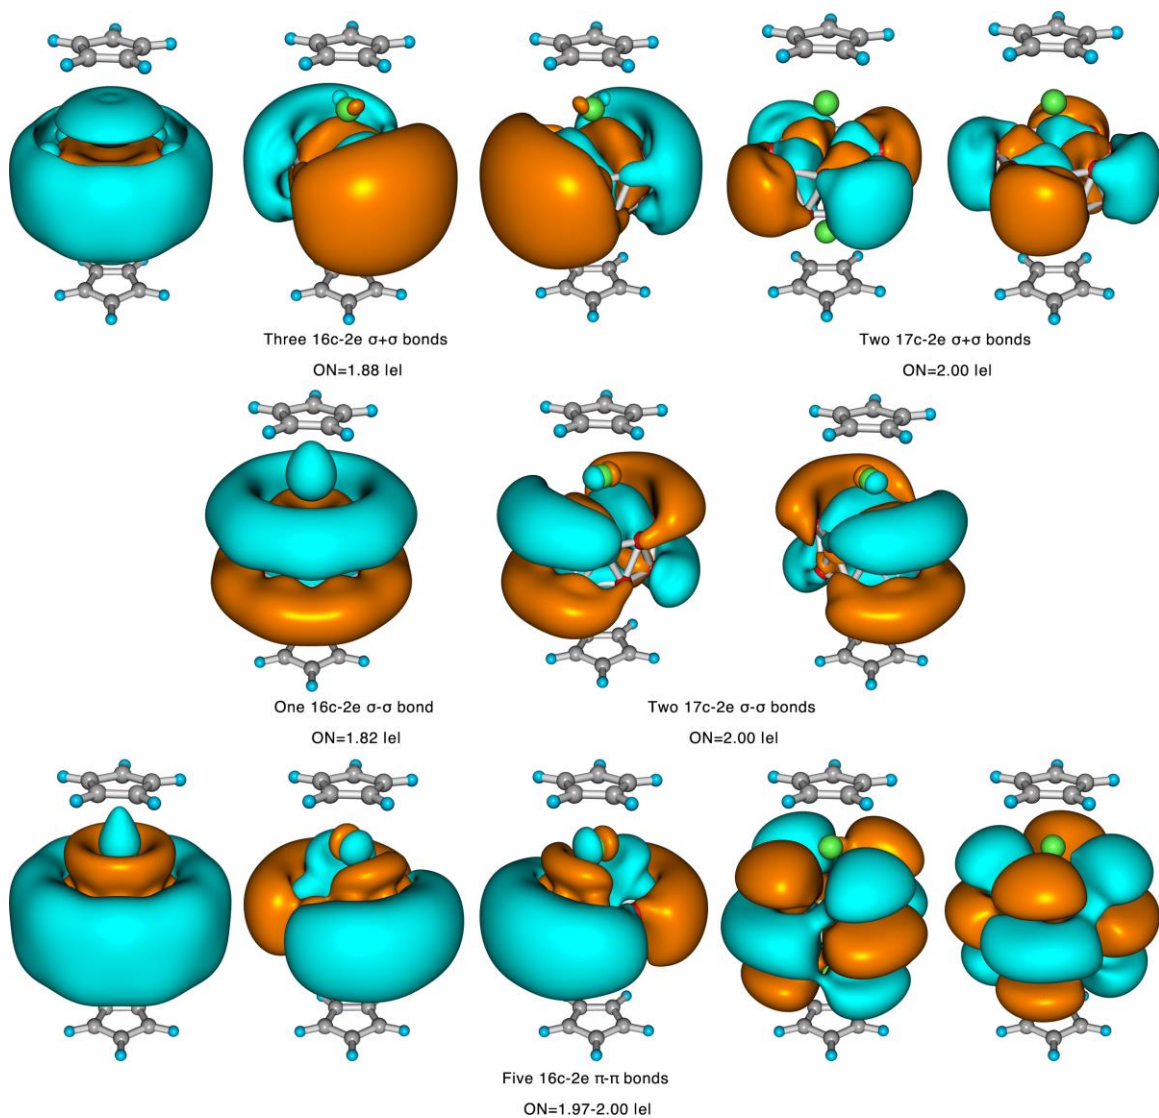

**Supplementary Figure 7. Delocalized elements of chemical bonding found on the  $\text{CoB}_{16}^{3-}$  fragment in  $[\text{CoB}_{16}(\text{CaCp})_2]^-$ .**

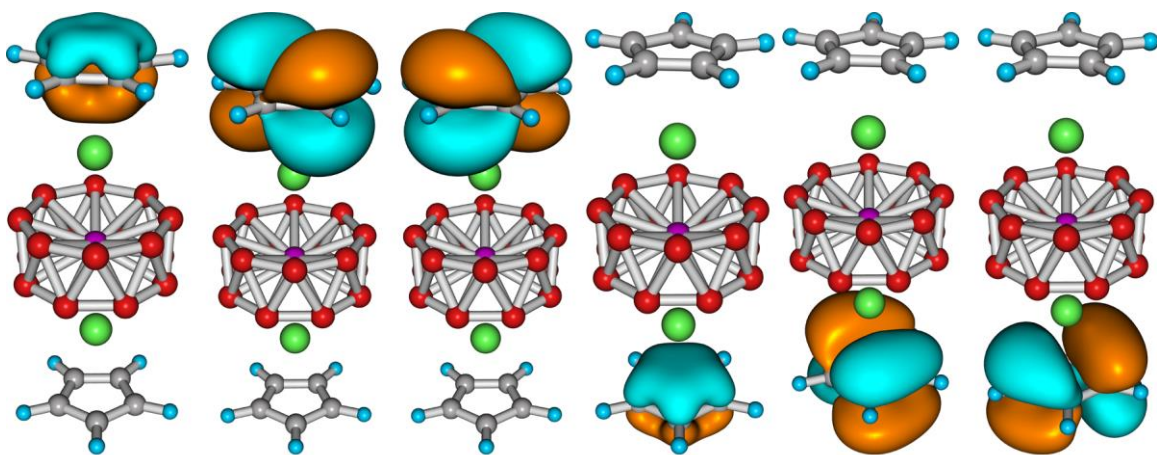

Six 5c-2e  $\pi$  bonds

ON=1.94-1.97 |e|

**Supplementary Figure 8. Delocalized elements of chemical bonding found on the  $C_5H_5^-$  fragments in  $[CoB_{16}(CaCp)_2]^-$ .**



**Supplementary Table 1.**

Cartesian coordinates of the three lowest energy isomers of the  $\text{CoB}_{16}^-$  cluster (I-III), neutral  $\text{CoB}_{16}$  isomer  $\text{I}^0$ , and the triple-decked  $[\text{CoB}_{16}(\text{CaCp})_2]^-$  sandwich compound at the PBE0/Def2-TZVP level of theory.

|           |    |              |              |              |
|-----------|----|--------------|--------------|--------------|
| <b>I</b>  | 5  | 0.000000000  | 2.072443000  | 0.806679000  |
|           | 27 | 0.000000000  | 0.000000000  | 0.000000000  |
|           | 5  | -1.465438000 | -1.465438000 | 0.806679000  |
|           | 5  | 1.465438000  | -1.465438000 | 0.806679000  |
|           | 5  | 2.072443000  | 0.000000000  | 0.806679000  |
|           | 5  | -2.072443000 | 0.000000000  | 0.806679000  |
|           | 5  | -1.465438000 | 1.465438000  | 0.806679000  |
|           | 5  | 1.465438000  | 1.465438000  | 0.806679000  |
|           | 5  | 0.000000000  | -2.072443000 | 0.806679000  |
|           | 5  | -1.914687000 | 0.793089000  | -0.806679000 |
|           | 5  | 0.793089000  | 1.914687000  | -0.806679000 |
|           | 5  | 0.793089000  | -1.914687000 | -0.806679000 |
|           | 5  | 1.914687000  | -0.793089000 | -0.806679000 |
|           | 5  | -0.793089000 | 1.914687000  | -0.806679000 |
|           | 5  | 1.914687000  | 0.793089000  | -0.806679000 |
|           | 5  | -0.793089000 | -1.914687000 | -0.806679000 |
|           | 5  | -1.914687000 | -0.793089000 | -0.806679000 |
| <b>II</b> | 5  | -1.926102000 | 0.772790000  | -0.817317000 |
|           | 27 | 0.000000000  | 0.000000000  | -0.003007000 |
|           | 5  | 1.926102000  | 0.772790000  | -0.817317000 |
|           | 5  | 0.772790000  | -1.926102000 | -0.817317000 |
|           | 5  | -0.772790000 | -1.926102000 | -0.817317000 |
|           | 5  | 0.772790000  | 1.926102000  | -0.817317000 |
|           | 5  | -0.772790000 | 1.926102000  | -0.817317000 |
|           | 5  | -1.926102000 | -0.772790000 | -0.817317000 |
|           | 5  | 1.926102000  | -0.772790000 | -0.817317000 |
|           | 5  | 0.000000000  | 2.103180000  | 0.773458000  |
|           | 5  | -2.103180000 | 0.000000000  | 0.773458000  |
|           | 5  | 1.423652000  | -1.423652000 | 0.865236000  |
|           | 5  | 0.000000000  | -2.103180000 | 0.773458000  |
|           | 5  | -1.423652000 | 1.423652000  | 0.865236000  |
|           | 5  | -1.423652000 | -1.423652000 | 0.865236000  |
|           | 5  | 2.103180000  | 0.000000000  | 0.773458000  |
|           | 5  | 1.423652000  | 1.423652000  | 0.865236000  |

|                                             |                      |              |              |              |
|---------------------------------------------|----------------------|--------------|--------------|--------------|
| <b>III</b>                                  | 27                   | 0.000000000  | 0.000000000  | 0.254632000  |
|                                             | 5                    | -1.598686000 | -0.027003000 | -1.298828000 |
|                                             | 5                    | 1.376226000  | 0.157703000  | 1.718441000  |
|                                             | 5                    | -0.769403000 | -0.124147000 | -2.723566000 |
|                                             | 5                    | -0.095219000 | 1.023694000  | -1.533573000 |
|                                             | 5                    | -1.376226000 | -0.157703000 | 1.718441000  |
|                                             | 5                    | 0.000000000  | -0.906301000 | 2.116848000  |
|                                             | 5                    | 0.769403000  | 0.124147000  | -2.723566000 |
|                                             | 5                    | 1.063171000  | -1.616745000 | -0.411190000 |
|                                             | 5                    | -1.063171000 | 1.616745000  | -0.411190000 |
|                                             | 5                    | -1.181627000 | 1.489917000  | 1.183241000  |
|                                             | 5                    | 2.033584000  | -0.232101000 | 0.261119000  |
|                                             | 5                    | 1.598686000  | 0.027003000  | -1.298828000 |
|                                             | 5                    | 1.181627000  | -1.489917000 | 1.183241000  |
|                                             | 5                    | -2.033584000 | 0.232101000  | 0.261119000  |
|                                             | 5                    | 0.095219000  | -1.023694000 | -1.533573000 |
|                                             | 5                    | 0.000000000  | 0.906301000  | 2.116848000  |
|                                             | <b>I<sup>0</sup></b> | 5            | 1.448199000  | 1.506481000  |
| 27                                          |                      | 0.000000000  | 0.000000000  | 0.000385000  |
| 5                                           |                      | 0.000000000  | -2.162238000 | -0.768730000 |
| 5                                           |                      | -1.949398000 | 0.000000000  | -0.836223000 |
| 5                                           |                      | -1.448199000 | 1.506481000  | -0.788339000 |
| 5                                           |                      | 1.448199000  | -1.506481000 | -0.788339000 |
| 5                                           |                      | 1.949398000  | 0.000000000  | -0.836223000 |
| 5                                           |                      | 0.000000000  | 2.162238000  | -0.768730000 |
| 5                                           |                      | -1.448199000 | -1.506481000 | -0.788339000 |
| 5                                           |                      | 1.990339000  | -0.802304000 | 0.769780000  |
| 5                                           |                      | 0.801384000  | 1.832645000  | 0.820516000  |
| 5                                           |                      | -1.990339000 | -0.802304000 | 0.769780000  |
| 5                                           |                      | -1.990339000 | 0.802304000  | 0.769780000  |
| 5                                           |                      | 1.990339000  | 0.802304000  | 0.769780000  |
| 5                                           |                      | -0.801384000 | 1.832645000  | 0.820516000  |
| 5                                           |                      | -0.801384000 | -1.832645000 | 0.820516000  |
| 5                                           |                      | 0.801384000  | -1.832645000 | 0.820516000  |
| <b>[CoB<sub>16</sub>(CaCp)<sub>2</sub>]</b> |                      | 5            | 0.407037000  | -0.804126000 |
|                                             | 27                   | 0.000000000  | 0.000000000  | 0.006130000  |
|                                             | 5                    | 1.158948000  | -0.803673000 | 1.740415000  |
|                                             | 5                    | -1.734320000 | -0.803739000 | 1.164948000  |
|                                             | 5                    | -2.046524000 | -0.804227000 | -0.400973000 |
|                                             | 5                    | 2.046585000  | -0.804103000 | 0.413103000  |
|                                             | 5                    | 1.734263000  | -0.803804000 | -1.152792000 |
|                                             | 5                    | -1.158844000 | -0.803729000 | -1.728218000 |
|                                             | 5                    | -0.407004000 | -0.804265000 | 2.052622000  |
|                                             | 5                    | 2.046524000  | 0.804227000  | -0.400973000 |
|                                             | 5                    | -0.407037000 | 0.804126000  | -2.040487000 |
|                                             | 5                    | -1.158948000 | 0.803673000  | 1.740415000  |

|    |              |              |              |
|----|--------------|--------------|--------------|
| 5  | -2.046585000 | 0.804103000  | 0.413103000  |
| 5  | 1.158844000  | 0.803729000  | -1.728218000 |
| 5  | -1.734263000 | 0.803804000  | -1.152792000 |
| 5  | 0.407004000  | 0.804265000  | 2.052622000  |
| 5  | 1.734320000  | 0.803739000  | 1.164948000  |
| 20 | 0.000000000  | 2.821886000  | 0.007190000  |
| 20 | 0.000000000  | -2.821886000 | 0.007190000  |
| 6  | 0.330494000  | 5.286924000  | 1.144656000  |
| 6  | 1.201179000  | 5.277963000  | 0.026871000  |
| 6  | 0.407202000  | 5.266431000  | -1.146524000 |
| 6  | -0.954154000 | 5.268140000  | -0.753962000 |
| 6  | -1.001663000 | 5.280773000  | 0.661969000  |
| 6  | 0.954154000  | -5.268140000 | -0.753962000 |
| 6  | 1.001663000  | -5.280773000 | 0.661969000  |
| 6  | -0.407202000 | -5.266431000 | -1.146524000 |
| 6  | -1.201179000 | -5.277963000 | 0.026871000  |
| 6  | -0.330494000 | -5.286924000 | 1.144656000  |
| 1  | 2.285178000  | 5.298079000  | 0.062981000  |
| 1  | 0.631016000  | 5.315278000  | 2.186602000  |
| 1  | -1.900047000 | 5.303272000  | 1.269566000  |
| 1  | -1.809892000 | 5.277818000  | -1.420519000 |
| 1  | 0.776775000  | 5.274625000  | -2.166339000 |
| 1  | -0.631016000 | -5.315278000 | 2.186602000  |
| 1  | -2.285178000 | -5.298079000 | 0.062981000  |
| 1  | -0.776775000 | -5.274625000 | -2.166339000 |
| 1  | 1.809892000  | -5.277818000 | -1.420519000 |
| 1  | 1.900047000  | -5.303272000 | 1.269566000  |

**Supplementary Table 2.**

The first two calculated VDE values for isomer III ( $C_2$ ,  $^1A$ ) of  $CoB_{16}^-$  at three levels of theory.

| Isomer III                                                                                                                          |      |                     |      |                        |                |
|-------------------------------------------------------------------------------------------------------------------------------------|------|---------------------|------|------------------------|----------------|
| $(1a^22a^21b^23a^22b^24a^23b^24b^25a^25b^26a^26b^27a^27b^28a^29a^210a^28b^211a^29b^212a^210b^213a^214a^211b^212b^215a^213b^216a^2)$ |      |                     |      |                        |                |
| UPBE0 <sup>a</sup>                                                                                                                  |      | UB3LYP <sup>b</sup> |      | ROCCSD(T) <sup>c</sup> |                |
| MO                                                                                                                                  | VDE  | MO                  | VDE  | MO                     | VDE            |
| 16a                                                                                                                                 | 3.35 | 16a                 | 3.32 | 16a                    | 3.65           |
| 13b                                                                                                                                 | 3.62 | 13b                 | 3.53 | 13b                    | — <sup>d</sup> |

<sup>a</sup> The VDEs were calculated at the UPBE0/6-311+G(2df)//UPBE0/Def2-TZVP level of theory. Spin-contamination was found to be very small.

<sup>b</sup> The VDEs were calculated at the UB3LYP/6-311+G(2df)//UPBE0/Def2-TZVP level of theory. Spin-contamination was found to be very small.

<sup>c</sup> The VDEs were calculated at the ROCCSD(T)/6-311+G(2df)//PBE0/Def2-TZVP level of theory, because the UHF wave function has a very high spin-contamination.

<sup>d</sup> VDE could not be calculated at this level of theory.

**Supplementary Table 3.**

Comparison of the bond distances in  $B_{16}$ ,  $CoB_{16}^-$  (isomers I and II), and  $[CoB_{16}(CaCp)_2]^-$  clusters at the PBE0/Def2-TZVP level of theory. All values are in Å.

|                          | $B_{16}$ | $CoB_{16}$<br>(structure I <sup>0</sup> ) | $CoB_{16}^-$<br>(isomer I) | $CoB_{16}^-$<br>(isomer II) | $[CoB_{16}(CaCp)_2]^-$ |
|--------------------------|----------|-------------------------------------------|----------------------------|-----------------------------|------------------------|
| R(Co-B)                  | -        | 2.12-2.29                                 | 2.22                       | 2.19-2.24                   | 2.24                   |
| R(peripheral B-B)        | 1.63     | 1.57-1.60                                 | 1.59                       | 1.55-1.63                   | 1.60                   |
| R(B-B between the rings) | 1.64     | 1.76-1.81                                 | 1.80                       | 1.78-1.87                   | 1.80                   |
